# Supplementary material for: The Protective Effect of Adenocaulon himalaicum Edgew. and Its Bioactive Compound Neochlorogenic Acid against UVB-Induced Skin Damage in Human Dermal Fibroblasts and Epidermal Keratinocytes
Source: MDPI journal article supplement (doi:10.3390/plants10081669), 2021-08-13
Supplement: s1 [file s1]

## Supplementary materials

### Protective Effect of *Adenocaulon himalaicum* Edgew. and Its Bioactive Compound Neochlorogenic Acid against UVB-Induced Skin Damage

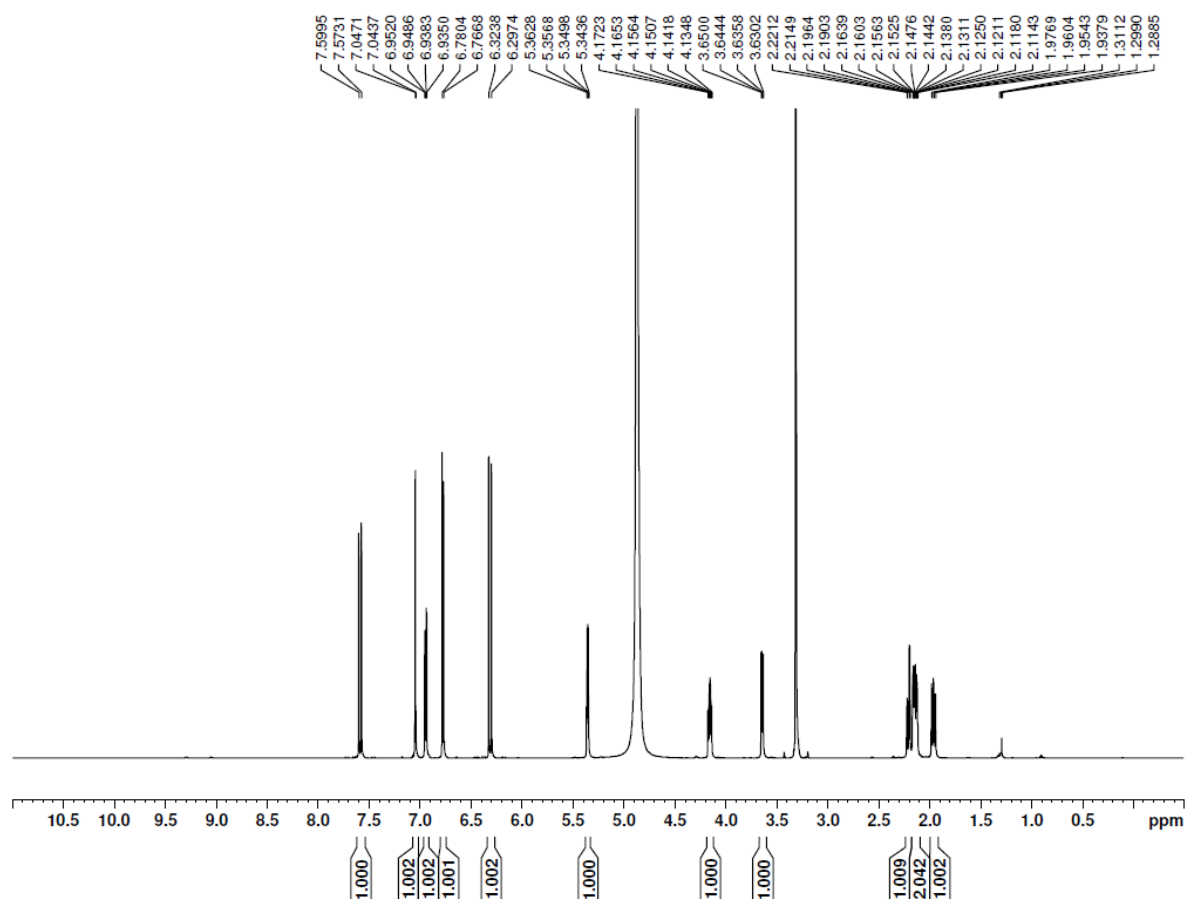

Figure S1.  $^1\text{H}$ -NMR spectrum of neochlorogenic acid

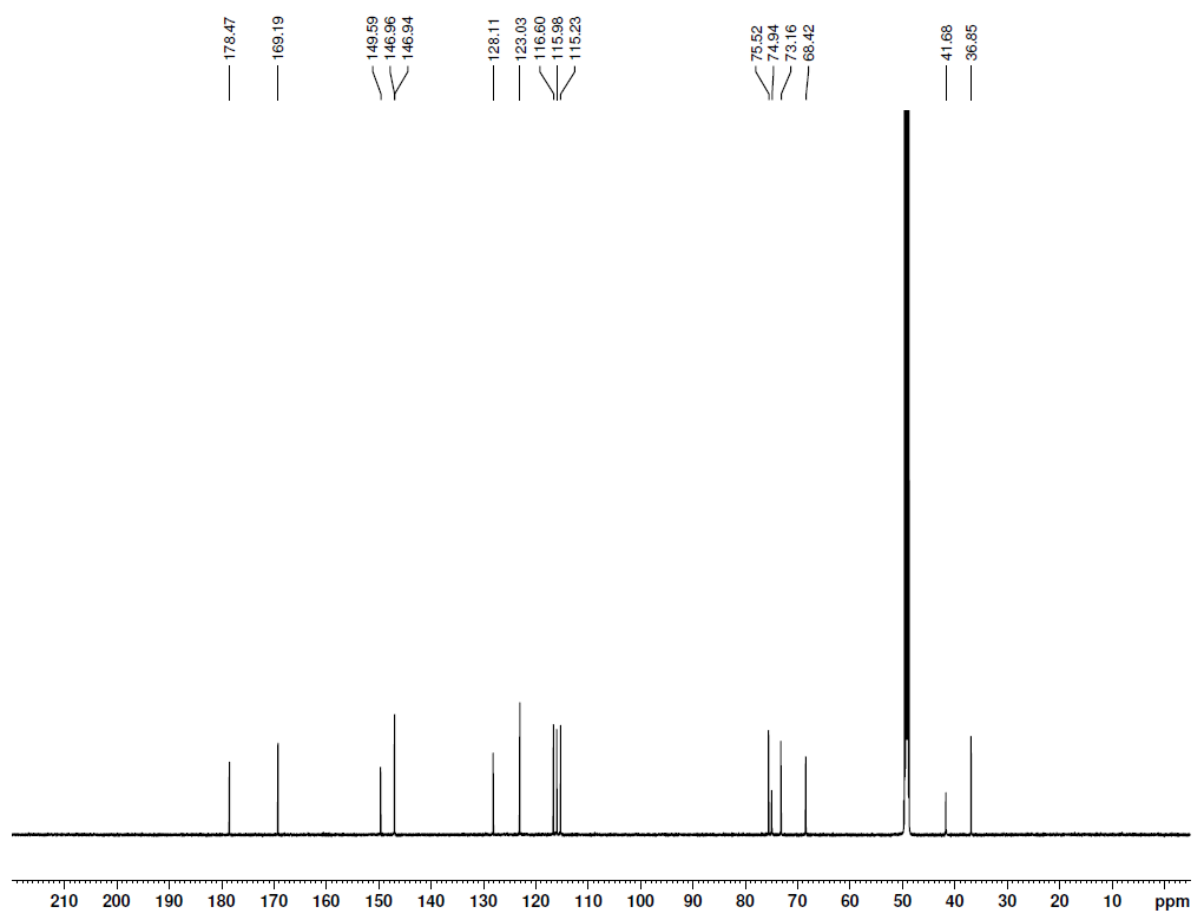

**Figure S2.**  $^{13}\text{C}$ -NMR spectrum of neochlorogenic acid

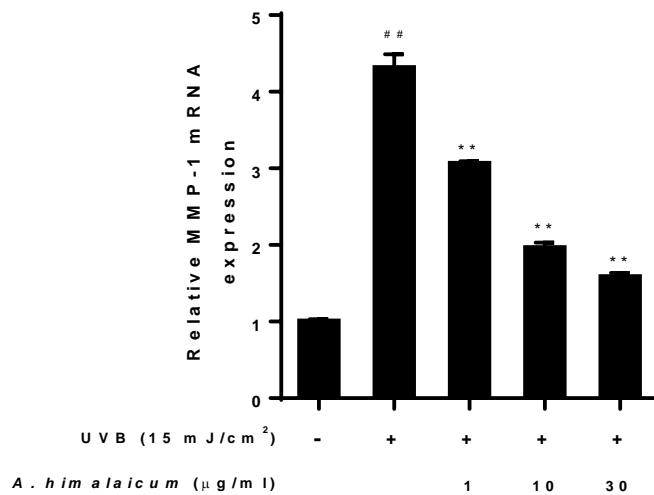

**Figure S3.** Effect of AHE on MMP-1 mRNA expression levels in UVB-irradiated Hs68 fibroblasts. Cells were exposed to UVB at 15 mJ/cm<sup>2</sup> and then treated with AHE (1, 10, 30 μg/ml) for 24 h. Total cellular RNA was extracted from AHE-treated cells. mRNA levels of MMP-1 were quantified by qRT-PCR and adjusted to GAPDH. Results are expressed as mean ± S.D. of three independent experiments; ##P<0.01 compared with the non-UVB irradiated control; \*\*P<0.01 compared with the UVB-irradiated control.

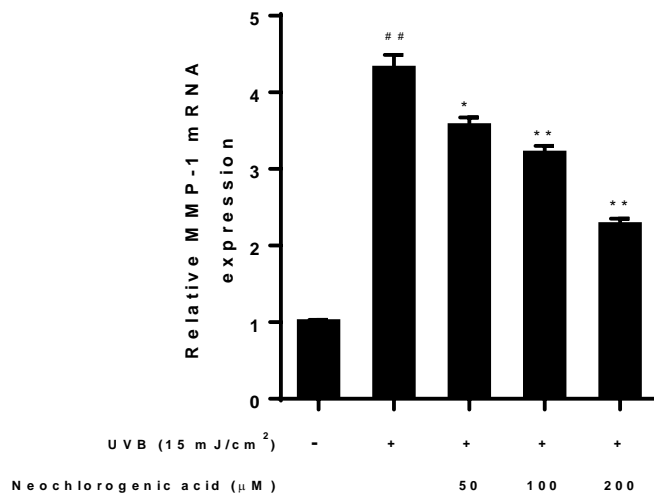

**Figure S4.** Effect of neochlorogenic acid on MMP-1 mRNA expression levels in UVB-irradiated Hs68 fibroblasts. Cells were exposed to UVB at 15 mJ/cm<sup>2</sup> and then treated with neochlorogenic acid (50, 100, 200 μM) for 24 h. Total cellular RNA was extracted from AHE-treated cells. mRNA levels of MMP-1 were quantified by qRT-PCR and adjusted to GAPDH. Results are expressed as mean ± S.D. of three independent experiments; ##P<0.01 compared with the non-UVB irradiated control; \*P<0.05, \*\*P<0.01 compared with the UVB-irradiated control.

compared with the UVB-irradiated control.
